# Supplementary material for: Synthesis, structure, and UV–VIS absorption spectra of azo dyes derived from (dialkylamino)thiazole dimers †
Source: Royal Society of Chemistry journal article supplement (doi:10.1039/b006991o), 2001-01-01
Supplement: b006991o.doc [file b006991o.doc]

#### Supplementary data

#### Synthesis, structure, and UV/VIS absorption spectra of azo dyes derived from (dialkylamino)thiazole dimers

**Jae Joon Kim,*a* Kazumasa Funabiki,*a* Hiroshige Muramatsu,*a***

Katsuyoshi Shibata,*a* Sung Hoon Kim,*b* Hisayoshi Shiozaki,*c*

Horst Hartmann*d* and Masaki Matsui**a*

*a Department of Chemistry, Faculty of Engineering, Gifu University, Yanagido, Gifu 501-1193, Japan. Tel.: +81 58 293 2601; Fax: +81 58 293 2601. E-mail: matsui@apchem.gifu-u.ac.jp*

*b Department of Dyeing and Finishing, College of Engineering, Kyungpook National University, Taegu, 702-701, Korea*

*c Technology Research Institute of Osaka Prefecture, Kishibe-naka 1-18-13, Suita 564-0002, Japan*

*d Fachhochschule Merseburg, Fachbereich Chemie, D-06217 Merseburg, Germany*

**5-Acetylamino-2-methoxy-4-(trifluoromethylsulfonyl)phenylazo-*N,N*-diethylaniline 4a.** Yield 84 %; mp 120 - 122 °C (Found: C, 50.95; H, 4.95; N, 11.82. C20H23F3N4O4S requires C, 50.84; H, 4.91; N, 11.86 %);** 1.26 (6H, t, *J* 7.2), 2.28 (3H, s), 3.52 (4H, q, *J* 7.2), 3.88 (3H, s), 7.32 (1H, s), 7.92 (2H, d, *J* 5.9), 8.11 (2H, d, *J* 5.9), 8.20 (1H, s, 1H); *m/z* 472 (M+; 59 %), 457 (100), 324 (17), 191 (13), 76 (11).

**5-Acetylamino-2-methoxy-2-(5-nitrothiazolylazo)-*N,N*-diethylaniline 4p.** Yield 12 %; mp 168 - 170 °C;** 1.35 (6H, t, *J* 7.1), 2.32 (3H, s), 3.68 (4H, q, *J* 7.1), 3.86 (3H, s), 7.31 (1H, s), 8.12 (1H, s), 8.56 (1H, s), 10.41 (1H, br s); *m/z* 392 (M+; 71 %), 377 (100), 276 (26), 235 (29), 191 (59), 177 (49).

**4-(Trifluoromethylsulfonyl)phenylazo-*N,N*-diethylaniline 5a.** Yield 86 %; mp 140 - 142 °C (Found: C, 52.88; H, 4.66; N, 10.88. C17H18F3N3O2S requires C, 52.98; H, 4.71; N, 10.90 %);** 1.26 (6H, t, *J* 7.1), 3.49 (4H, q, *J* 7.1), 6.74 (2H, d, *J* 9.2), 7.90 (2H, d, *J* 9.0), 8.00 (2H, d, *J* 9.2), 8.10 (2H, d, *J* 9.0); *m/z* 385 (M+; 69 %), 370 (77), 237 (35), 148 (100), 119 (30), 76 (33).

**9-[4-(Trifluoromethylsulfonyl)phenylazo]-2,3,6,7-tetrahydro-1*H*,5*H*-benzo[*ij*]quinolizine 6a.** Yield 40 %; mp 208 - 210 °C (Found: C, 55.39; H, 4.35; N, 9.81. C19H18F3N3O2S requires C, 55.74; H, 4.43; N, 10.26 %);** 2.00 (4H, quint, *J* 5.8), 2.84 (4H, t, *J* 5.8), 3.35 (4H, t, *J* 5.8), 7.51 (2H, s), 7.96 (2H, d, *J* 8.7), 8.07 (2H, d, *J* 8.7); *m/z* 409 (M+; 62 %), 172 (100).

**9-[2-(5-Nitrothiazolylazo)]-2,3,6,7-tetrahydro-1*H*,5*H*-benzo[*ij*]quinolizine 6p.** Yield 10 %; mp >300 °C (Found: C, 54.69; H, 4.71; N, 21.21. C15H15N5O2S requires C, 54.70; H, 4.59; N, 21.26 %);** 2.02 (4H, quint, *J* 5.7), 2.80 (4H, t, *J* 5.7), 3.44 (4H, t, *J* 5.7), 7.52 (2H, s), 8.57 (1H, s); *m/z* 329 (M+; 45 %), 172 (100).

**4-[4-(Trifluoromethylsulfonyl)phenylazo]-1-naphthylamine 7a.** Yield 9 %; mp 189 -190 °C (Found: C, 53.80; H, 3.22; N, 11.10. C17H12F3N3O2S requires C, 53.82; H, 3.19; N, 11.08 %);** 4.91 (2H, s), 6.83 (1H, d, *J* 8.3), 7.58 (1H, t, *J* 7.6), 7.70 (1H, t, *J* 7.6), 7.83 (1H, d, *J* 7.6), 8.07 (1H, d, *J* 8.3), 8.15 - 8.17 (4H, m), 9.04 (1H, d, *J* 7.6); *m/z* 379 (M+; 24 %), 142 (100), 115 (52).

2,3-Dihydro-2,2-dimethyl-6-[4-(trifluoromethylsulfonyl)phenylazo]perimidine 8a. Yield 73 %; mp 222 - 223 °C (Found: C, 54.88; H, 3.92; N, 12.85. C20H17F3N4O2S requires C, 55.29; H, 3.94; N, 12.90 %);** 1.63 (6H, s), 4.33 (1H, br s), 5.02 (1H, br s), 6.52 (1H, d, *J* 8.2), 6.62 (2H, d, *J* 6.6), 7.49 (1H, t, *J* 8.2), 8.08 (1H, d, *J* 8.2), 8.13 (2H, d, *J* 6.6), 8.15 (1H, d, *J* 8.6), 8.31 (1H, d, *J* 8.6); *m/z* 434 (M+; 100 %), 419 (89), 286 (29), 182 (62).

2,3-Dihydro-2,2-dimethyl-6-(4-nitrophenylazo)perimidine 8c. Yield 74 %; mp 205 - 206 °C (Found: C, 65.71; H, 5.02; N, 20.25. C19H17N5OS2 requires C, 65.69; H, 4.93; N, 20.16 %);** 1.60 (6H, s), 4.30 (1H, br s), 4.93 (1H, br s), 6.50 (1H, d, *J* 7.8), 6.60 (2H, d, *J* 6.2), 7.47 (1H, t, *J* 7.8), 8.01 (1H, d, *J* 7.8), 8.03 (2H, d, *J* 6.2), 8.29 (1H, d, *J* 8.5), 8.35 (1H, d, *J* 8.5); *m/z* 347 (M+; 77 %), 332 (100), 197 (24), 182 (99).

2,3-Dihydro-2,2-dimethyl-6-[2-(5-nitrothiazolylazo)]perimidine 8p. Yield 11 %; mp >300 °C (Found: C, 53.82; H, 4.20; N, 22.76. C16H14N6O2S requires C, 54.23; H, 3.98; N, 23.71 %);** 1.74 (6H, s), 4.51 (2H, br s), 6.54 (1H, d, *J* 7.7), 7.01 (1H, d, *J* 8.6), 7.02 (1H, d, *J* 7.7), 7.43 (1H, t, *J* 7.7), 7.46 (1H, d, *J* 8.6), 8.53 (1H, s); *m/z* 354 (M+; 47 %), 339 (46), 293 (22), 197 (32), 182 (100).

3-Cyano-1-ethyl-5-hydroxy-4-methyl-5-[4-(trifluoromethylsulfonyl)phenylazo]-2-pyridone 9a. Yield 40 %; mp 228 - 231 °C (Found: C, 45.80; H, 3.07; N, 13.28. C16H13F3N4O4S requires C, 46.38; H, 3.16; N, 13.52 %);** 1.06 (3H, t, *J* 6.8), 2.54 (3H, s), 3.85 (2H, q, *J* 6.8), 7.81 (2H, d, *J* 8.2), 8.06 (2H, d, *J* 8.2); *m/z* 414 (M+; 100 %), 297 (60), 281 (59), 90 (48), 76 (22).
